# Supplementary material
Source: PubMed Central journal article supplement (PMC3677713)
Supplement: NIHMS472809-supplement-supplement_1.pdf [file NIHMS472809-supplement-supplement_1.pdf]

normal skin were cultured with CFSE-labeled allogeneic T cells +/- 25% TSN. Percentages of proliferating cells within live CD3<sup>+</sup>CD4<sup>+</sup> and CD3<sup>+</sup>CD8<sup>+</sup> cells were determined by CFSE dilution. (B) FACS histograms of CFSE dilution assay using LCs and TSN. Numbers show percentages of proliferating cells. (C) Effect of TSN on production of IFN- $\gamma$ , IL-4, IL-17, and IL-22 by CD4<sup>+</sup> and CD8<sup>+</sup> T cells. n.s., not significant. (D) Dot plot analysis of IFN- $\gamma$ , IL-4, IL-17, and IL-22 expression in proliferating CD4<sup>+</sup> and CD8<sup>+</sup> T cells stimulated by LCs +/-TSN. Numbers show percent gated cells.

**Figure 4:** TSN enhances proliferation and IFN- $\gamma$  response by CD4<sup>+</sup> and CD8<sup>+</sup> T cells induced by in vitro-generated LCs, but suppresses those by monocyte-derived DCs. (A) CD1a<sup>+</sup>CD14<sup>-</sup> LC-type DCs derived from CD34<sup>+</sup> hematopoietic progenitors, or, monocyte-derived DCs were cultured with CFSE-labeled T cells +/- 25% TSN. Percentages of proliferating cells were determined by CFSE dilution. (B) FACS histograms of CFSE dilution assay. Numbers show percentages of proliferating cells. (C) Effect of TSN on in vitro generated LC or DC driven production of IFN- $\gamma$ , IL-4, IL-17, or IL-22, by CD4<sup>+</sup> and CD8<sup>+</sup> T-cells. n.s., not significant. (D) Dot plot analysis of IFN- $\gamma$ , IL-4, IL-17, and IL-22 expression in proliferating CD4<sup>+</sup> and CD8<sup>+</sup> T cells stimulated by LC-type DCs or mono-DCs, +/- TSN. Numbers show percent gated cells.

**Supplementary Figure 1:** Flow cytometric analysis of surface molecules expressed on LCs from SCC and peritumoral non-lesional skin. HLA-DR<sup>+</sup>CD207<sup>+</sup> LCs in the epidermal cell suspensions from SCC and peritumoral non-lesional skin were subjected to the

analysis of cell surface expression of CD200, CD25, CD137, CD205, CD150, and receptor activator of nuclear factor  $\kappa$ B (RANK). Target molecules were selected from the gene list shown in Supplementary Table 2. Green lines, isotype controls; blue lines, LCs from SCC; red lines, LCs from SCC. Mean fluorescence intensity values are shown in the upper right hand of each histogram. Data represent 1 of 3 independent experiments.

**Supplementary Figure 2:** Flow cytometric analysis of surface molecules on in vitro-generated LC-type DCs. LC-type DCs were FACS-sorted as CD1a+CD14<sup>-</sup> cells from CD34<sup>+</sup> hematopoietic progenitors cultured for 8 days with GM-CSF, TNF $\alpha$ , and Flt3L. CD1a+CD14<sup>-</sup> cells from CD34<sup>+</sup> hematopoietic progenitors were subjected to the analysis of cell surface expression of HLA-DR and CD207. Shaded areas indicate isotype controls. Data are representative of three independent experiments.

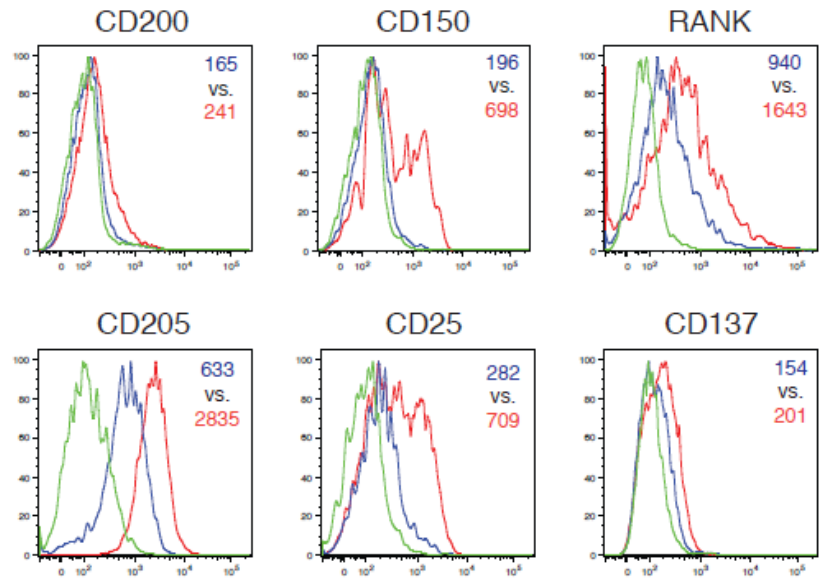

Supplementary Figure 1

Supplementary Figure S2

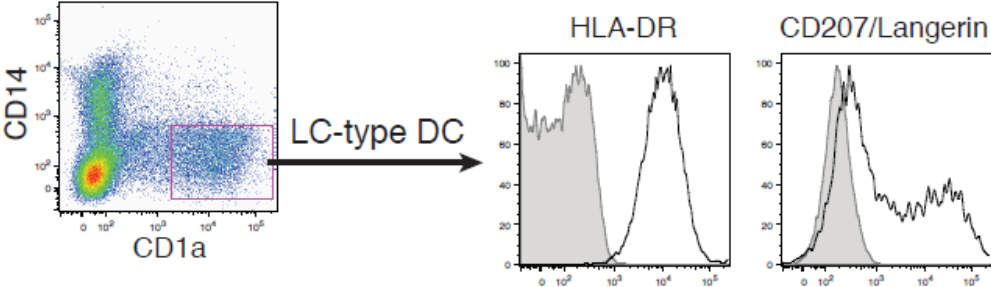

Table S1 Genomic expression differences between SCC-derived LCs and PTNL skin-derived LCs

| Probe                                    | Symbol    | Description                                                                                       | Fold Change | P value | FDR     |
|------------------------------------------|-----------|---------------------------------------------------------------------------------------------------|-------------|---------|---------|
| <b>Upregulated genes in LCs from SCC</b> |           |                                                                                                   |             |         |         |
| 202350_s_at                              | MATN2     | matrilin 2                                                                                        | 10.088      | 0.001   | 0.08    |
| 238790_at                                | LOC374443 | CLR pseudogene                                                                                    | 9.65        | <0.0001 | 0.01    |
| 1552365_at                               | SCIN      | scinderin                                                                                         | 9.271       | 0.001   | 0.09    |
| 209583_s_at                              | CD200     | CD200 molecule                                                                                    | 8.291       | <0.0001 | <0.0001 |
| 242586_at                                | FSD1L     | fibronectin type III and SPRY domain containing 1-like                                            | 7.433       | 0.001   | 0.07    |
| 227985_at                                |           |                                                                                                   | 7.404       | <0.0001 | 0.04    |
| 217553_at                                | MGC87042  | STEAP family protein MGC87042                                                                     | 6.878       | <0.0001 | 0.03    |
| 202833_s_at                              | SERPINA1  | serpin peptidase inhibitor, clade A (alpha-1 antiproteinase, antitrypsin), member 1               | 6.722       | 0.004   | 0.15    |
| 206336_at                                | CXCL6     | chemokine (C-X-C motif) ligand 6 (granulocyte chemotactic protein 2)                              | 6.442       | 0.004   | 0.14    |
| 205816_at                                | ITGB8     | integrin, beta 8                                                                                  | 6.409       | <0.0001 | 0.01    |
| 227646_at                                | EBF1      | early B-cell factor 1                                                                             | 6.36        | <0.0001 | 0.06    |
| 204161_s_at                              | ENPP4     | ectonucleotide pyrophosphatase/phosphodiesterase 4 (putative function)                            | 6.352       | <0.0001 | 0.06    |
| 229504_at                                |           |                                                                                                   | 6.284       | <0.0001 | 0.03    |
| 202436_s_at                              | CYP1B1    | cytochrome P450, family 1, subfamily B, polypeptide 1                                             | 5.851       | 0.004   | 0.15    |
| 218469_at                                | GREM1     | gremlin 1, cysteine knot superfamily, homolog (Xenopus laevis)                                    | 5.79        | 0.004   | 0.14    |
| 210146_x_at                              | LILRB2    | leukocyte immunoglobulin-like receptor, subfamily B (with TM and ITIM domains), member 2          | 5.726       | <0.0001 | 0.03    |
| 203397_s_at                              | GALNT3    | UDP-N-acetyl-alpha-D-galactosamine:polypeptide N-acetylgalactosaminyltransferase 3 (GalNAc-T3)    | 5.684       | <0.0001 | 0.02    |
| 227290_at                                |           |                                                                                                   | 5.606       | <0.0001 | 0.06    |
| 200832_s_at                              | SCD       | stearoyl-CoA desaturase (delta-9-desaturase)                                                      | 5.565       | 0.001   | 0.08    |
| 220643_s_at                              | FAIM      | Fas apoptotic inhibitory molecule                                                                 | 5.507       | 0.001   | 0.07    |
| 203874_s_at                              | SMARCA1   | SWI/SNF related, matrix associated, actin dependent regulator of chromatin, subfamily a, member 1 | 5.475       | <0.0001 | 0.01    |
| 211429_s_at                              | SERPINA1  | serpin peptidase inhibitor, clade A (alpha-1 antiproteinase, antitrypsin), member 1               | 5.398       | <0.0001 | 0.06    |
| 235318_at                                | FBN1      | fibrillin 1                                                                                       | 5.395       | <0.0001 | 0.05    |
| 206181_at                                | SLAMF1    | signaling lymphocytic activation molecule family member 1                                         | 5.308       | 0.003   | 0.13    |
| 226925_at                                | ACPL2     | acid phosphatase-like 2                                                                           | 5.269       | 0.001   | 0.09    |
| 225763_at                                | RCSD1     | RCSD domain containing 1                                                                          | 5.14        | <0.0001 | <0.0001 |
| 1552394_a_at                             | ENTHD1    | ENTH domain containing 1                                                                          | 5.078       | 0.004   | 0.14    |
| 221019_s_at                              | COLEC12   | collectin sub-family member 12                                                                    | 4.96        | 0.003   | 0.13    |
| 211423_s_at                              | SC5DL     | sterol-C5-desaturase (ERG3 delta-5-desaturase homolog, S. cerevisiae)-like                        | 4.957       | <0.0001 | 0.01    |
| 228152_s_at                              | DDX60L    | DEAD (Asp-Glu-Ala-Asp) box polypeptide 60-like                                                    | 4.891       | 0.001   | 0.07    |
| 206118_at                                | STAT4     | signal transducer and activator of transcription 4                                                | 4.881       | <0.0001 | 0.04    |
| 224724_at                                | SULF2     | sulfatase 2                                                                                       | 4.859       | 0.002   | 0.1     |
| 226390_at                                | STARD4    | StAR-related lipid transfer (START) domain containing 4                                           | 4.797       | <0.0001 | 0.04    |
| 223159_s_at                              | NEK6      | NIMA (never in mitosis gene a)-related kinase 6                                                   | 4.77        | 0.001   | 0.07    |
| 220132_s_at                              | CLEC2D    | C-type lectin domain family 2, member D                                                           | 4.768       | <0.0001 | 0.04    |

|             |            |                                                                                                      |       |         |         |
|-------------|------------|------------------------------------------------------------------------------------------------------|-------|---------|---------|
| 1552393_at  | ENTHD1     | ENTH domain containing 1                                                                             | 4.742 | 0.005   | 0.16    |
| 224833_at   | ETS1       | v-ets erythroblastosis virus E26 oncogene homolog 1 (avian)                                          | 4.737 | <0.0001 | 0.02    |
| 211056_s_at | SRD5A1     | steroid-5-alpha-reductase, alpha polypeptide 1 (3-oxo-5 alpha-steroid delta 4-dehydrogenase alpha 1) | 4.736 | <0.0001 | <0.0001 |
| 212325_at   | LIMCH1     | LIM and calponin homology domains 1                                                                  | 4.727 | <0.0001 | 0.03    |
| 205767_at   | EREG       | epiregulin                                                                                           | 4.719 | 0.005   | 0.16    |
| 212190_at   | SERPINE2   | serpin peptidase inhibitor, clade E (nexin, plasminogen activator inhibitor type 1), member 2        | 4.696 | 0.002   | 0.11    |
| 203158_s_at | GLS        | glutaminase                                                                                          | 4.673 | <0.0001 | 0.02    |
| 203373_at   | SOCS2      | suppressor of cytokine signaling 2                                                                   | 4.638 | <0.0001 | 0.03    |
| 217371_s_at | IL15       | interleukin 15                                                                                       | 4.629 | 0.001   | 0.08    |
| 204849_at   | TCFL5      | transcription factor-like 5 (basic helix-loop-helix)                                                 | 4.628 | 0.002   | 0.11    |
| 205222_at   | EHHADH     | enoyl-Coenzyme A, hydratase/3-hydroxyacyl Coenzyme A dehydrogenase                                   | 4.605 | 0.001   | 0.08    |
| 1569599_at  | SAMSN1     | SAM domain, SH3 domain and nuclear localization signals 1                                            | 4.537 | 0.007   | 0.18    |
| 228933_at   | NHS        | Nance-Horan syndrome (congenital cataracts and dental anomalies)                                     | 4.518 | <0.0001 | 0.05    |
| 224444_s_at | C1orf97    | chromosome 1 open reading frame 97                                                                   | 4.514 | 0.001   | 0.08    |
| 200965_s_at | ABLIM1     | actin binding LIM protein 1                                                                          | 4.512 | 0.004   | 0.14    |
| 211144_x_at |            |                                                                                                      | 4.508 | 0.003   | 0.13    |
| 223463_at   | RAB23      | RAB23, member RAS oncogene family                                                                    | 4.506 | <0.0001 | 0.02    |
| 202925_s_at | PLAGL2     | pleiomorphic adenoma gene-like 2                                                                     | 4.487 | <0.0001 | 0.04    |
| 236600_at   | SPG20      | spastic paraplegia 20 (Troyer syndrome)                                                              | 4.474 | 0.001   | 0.09    |
| 214660_at   |            |                                                                                                      | 4.469 | 0.002   | 0.12    |
| 204160_s_at | ENPP4      | ectonucleotide pyrophosphatase/phosphodiesterase 4 (putative function)                               | 4.457 | 0.001   | 0.07    |
| 202437_s_at | CYP1B1     | cytochrome P450, family 1, subfamily B, polypeptide 1                                                | 4.388 | 0.002   | 0.11    |
| 230904_at   | FSD1L      | fibronectin type III and SPRY domain containing 1-like                                               | 4.373 | 0.001   | 0.09    |
| 206003_at   | CEP135     | centrosomal protein 135kDa                                                                           | 4.359 | <0.0001 | 0.01    |
| 235678_at   | GM2A       | GM2 ganglioside activator                                                                            | 4.322 | <0.0001 | 0.04    |
| 238846_at   | TNFRSF11A  | tumor necrosis factor receptor superfamily, member 11a, NFkB activator                               | 4.314 | <0.0001 | 0.04    |
| 219718_at   | FGGY       | FGGY carbohydrate kinase domain containing                                                           | 4.3   | <0.0001 | 0.04    |
| 224443_at   | C1orf97    | chromosome 1 open reading frame 97                                                                   | 4.289 | <0.0001 | 0.05    |
| 243087_at   | WDR63      | WD repeat domain 63                                                                                  | 4.267 | 0.001   | 0.07    |
| 235304_at   |            |                                                                                                      | 4.251 | 0.007   | 0.18    |
| 226556_at   |            |                                                                                                      | 4.25  | <0.0001 | 0.01    |
| 231303_at   | NCRNA00158 | non-protein coding RNA 158                                                                           | 4.244 | 0.006   | 0.17    |
| 230864_at   | MGC42105   | serine/threonine-protein kinase NIM1                                                                 | 4.238 | 0.003   | 0.12    |
| 233500_x_at | CLEC2D     | C-type lectin domain family 2, member D                                                              | 4.237 | <0.0001 | 0.03    |
| 222108_at   | AMIGO2     | adhesion molecule with Ig-like domain 2                                                              | 4.197 | 0.003   | 0.13    |
| 213093_at   | PRKCA      | protein kinase C, alpha                                                                              | 4.177 | 0.002   | 0.12    |
| 209146_at   | SC4MOL     | sterol-C4-methyl oxidase-like                                                                        | 4.145 | <0.0001 | 0.01    |
| 224800_at   | WDFY1      | WD repeat and FYVE domain containing 1                                                               | 4.123 | 0.006   | 0.17    |
| 216575_at   |            |                                                                                                      | 4.119 | 0.002   | 0.11    |
| 213430_at   | RUFY3      | RUN and FYVE domain containing 3                                                                     | 4.11  | <0.0001 | 0.01    |
| 202007_at   | NID1       | nidogen 1                                                                                            | 4.09  | <0.0001 | 0.02    |
| 225525_at   | KIAA1671   | KIAA1671                                                                                             | 4.057 | 0.004   | 0.15    |

|             |          |                                                                                                   |       |         |      |
|-------------|----------|---------------------------------------------------------------------------------------------------|-------|---------|------|
| 223423_at   | GPR160   | G protein-coupled receptor 160                                                                    | 4.029 | <0.0001 | 0.03 |
| 223839_s_at | SCD      | stearoyl-CoA desaturase (delta-9-desaturase)                                                      | 4.023 | 0.006   | 0.17 |
| 239413_at   | CEP152   | centrosomal protein 152kDa                                                                        | 4.019 | <0.0001 | 0.05 |
| 238513_at   | PRRG4    | proline rich Gla (G-carboxyglutamic acid) 4 (transmembrane)                                       | 4.016 | 0.001   | 0.07 |
| 203086_at   | KIF2A    | kinesin heavy chain member 2A                                                                     | 4.013 | 0.001   | 0.08 |
| 234284_at   | GNG8     | guanine nucleotide binding protein (G protein), gamma 8                                           | 4.01  | <0.0001 | 0.03 |
| 202539_s_at | HMGCR    | 3-hydroxy-3-methylglutaryl-Coenzyme A reductase                                                   | 3.985 | 0.002   | 0.11 |
| 210073_at   | ST8SIA1  | ST8 alpha-N-acetyl-neuraminide alpha-2,8-sialyltransferase 1                                      | 3.973 | 0.008   | 0.19 |
| 213552_at   | GLCE     | glucuronic acid epimerase                                                                         | 3.958 | 0.004   | 0.15 |
| 204205_at   | APOBEC3G | apolipoprotein B mRNA editing enzyme, catalytic polypeptide-like 3G                               | 3.955 | <0.0001 | 0.05 |
| 1559776_at  | GM2A     | GM2 ganglioside activator                                                                         | 3.951 | <0.0001 | 0.06 |
| 215016_x_at | DST      | dystonin                                                                                          | 3.913 | 0.001   | 0.09 |
| 204526_s_at | TBC1D8   | TBC1 domain family, member 8 (with GRAM domain)                                                   | 3.901 | 0.002   | 0.1  |
| 205668_at   | LY75     | lymphocyte antigen 75                                                                             | 3.901 | <0.0001 | 0.05 |
| 203139_at   | DAPK1    | death-associated protein kinase 1                                                                 | 3.896 | 0.002   | 0.1  |
| 225205_at   | KIF3B    | kinesin family member 3B                                                                          | 3.893 | <0.0001 | 0.01 |
| 1554519_at  | CD80     | CD80 molecule                                                                                     | 3.889 | 0.001   | 0.08 |
| 228333_at   |          |                                                                                                   | 3.889 | 0.001   | 0.08 |
| 232231_at   | RUNX2    | runt-related transcription factor 2                                                               | 3.86  | 0.006   | 0.17 |
| 239401_at   | S1PR1    | sphingosine-1-phosphate receptor 1                                                                | 3.794 | 0.005   | 0.16 |
| 202786_at   | STK39    | serine threonine kinase 39 (STE20/SPS1 homolog, yeast)                                            | 3.764 | 0.001   | 0.09 |
| 219675_s_at | UXS1     | UDP-glucuronate decarboxylase 1                                                                   | 3.755 | <0.0001 | 0.02 |
| 225583_at   | UXS1     | UDP-glucuronate decarboxylase 1                                                                   | 3.755 | <0.0001 | 0.02 |
| 209813_x_at |          |                                                                                                   | 3.745 | 0.007   | 0.17 |
| 204820_s_at |          |                                                                                                   | 3.738 | 0.006   | 0.17 |
| 229670_at   |          |                                                                                                   | 3.715 | 0.001   | 0.09 |
| 215389_s_at | TNNT2    | troponin T type 2 (cardiac)                                                                       | 3.69  | 0.004   | 0.15 |
| 209406_at   | BAG2     | BCL2-associated athanogene 2                                                                      | 3.689 | <0.0001 | 0.06 |
| 209582_s_at | CD200    | CD200 molecule                                                                                    | 3.68  | 0.001   | 0.08 |
| 202270_at   | GBP1     | guanylate binding protein 1, interferon-inducible, 67kDa                                          | 3.666 | 0.004   | 0.15 |
| 1559500_at  | VPS8     | vacuolar protein sorting 8 homolog (S. cerevisiae)                                                | 3.66  | 0.005   | 0.16 |
| 211339_s_at | ITK      | IL2-inducible T-cell kinase                                                                       | 3.645 | 0.008   | 0.19 |
| 205899_at   | CCNA1    | cyclin A1                                                                                         | 3.636 | 0.003   | 0.13 |
| 215806_x_at |          |                                                                                                   | 3.625 | 0.004   | 0.15 |
| 239870_at   |          |                                                                                                   | 3.606 | <0.0001 | 0.04 |
| 223324_s_at | TRPM7    | transient receptor potential cation channel, subfamily M, member 7                                | 3.601 | 0.001   | 0.08 |
| 228286_at   | GEN1     | Gen homolog 1, endonuclease (Drosophila)                                                          | 3.593 | <0.0001 | 0.04 |
| 238559_at   |          |                                                                                                   | 3.593 | 0.001   | 0.09 |
| 203875_at   | SMARCA1  | SWI/SNF related, matrix associated, actin dependent regulator of chromatin, subfamily a, member 1 | 3.585 | <0.0001 | 0.01 |
| 213800_at   | CFH      | complement factor H                                                                               | 3.581 | 0.001   | 0.09 |
| 212254_s_at | DST      | dystonin                                                                                          | 3.578 | 0.001   | 0.07 |
| 224358_s_at | MS4A7    | membrane-spanning 4-domains, subfamily A, member 7                                                | 3.571 | 0.002   | 0.11 |

|              |              |                                                                                                      |       |         |      |
|--------------|--------------|------------------------------------------------------------------------------------------------------|-------|---------|------|
| 229146_at    | C7orf31      | chromosome 7 open reading frame 31                                                                   | 3.57  | <0.0001 | 0.06 |
| 235052_at    | ZNF792       | zinc finger protein 792                                                                              | 3.569 | <0.0001 | 0.06 |
| 212350_at    | TBC1D1       | TBC1 (tre-2/USP6, BUB2, cdc16) domain family, member 1                                               | 3.564 | <0.0001 | 0.01 |
| 212298_at    | NRP1         | neuropilin 1                                                                                         | 3.561 | 0.006   | 0.17 |
| 1555355_a_at | ETS1         | v-ets erythroblastosis virus E26 oncogene homolog 1 (avian)                                          | 3.559 | <0.0001 | 0.01 |
| 201791_s_at  | DHCR7        | 7-dehydrocholesterol reductase                                                                       | 3.559 | 0.004   | 0.15 |
| 219543_at    | PBLD         | phenazine biosynthesis-like protein domain containing                                                | 3.545 | 0.005   | 0.16 |
| 228438_at    | LOC100132891 | hypothetical protein LOC100132891                                                                    | 3.506 | 0.002   | 0.12 |
| 210959_s_at  | SRD5A1       | steroid-5-alpha-reductase, alpha polypeptide 1 (3-oxo-5 alpha-steroid delta 4-dehydrogenase alpha 1) | 3.502 | <0.0001 | 0.01 |
| 203913_s_at  | HPGD         | hydroxyprostaglandin dehydrogenase 15-(NAD)                                                          | 3.5   | 0.008   | 0.19 |
| 235522_at    | CLEC2D       | C-type lectin domain family 2, member D                                                              | 3.498 | 0.004   | 0.15 |
| 209459_s_at  | ABAT         | 4-aminobutyrate aminotransferase                                                                     | 3.458 | 0.001   | 0.09 |
| 207037_at    | TNFRSF11A    | tumor necrosis factor receptor superfamily, member 11a, NFkB activator                               | 3.457 | <0.0001 | 0.05 |
| 213208_at    | KIAA0240     | KIAA0240                                                                                             | 3.448 | 0.002   | 0.1  |
| 205676_at    | CYP27B1      | cytochrome P450, family 27, subfamily B, polypeptide 1                                               | 3.445 | 0.007   | 0.17 |
| 206710_s_at  | EPB41L3      | erythrocyte membrane protein band 4.1-like 3                                                         | 3.429 | 0.003   | 0.12 |
| 1560156_at   |              |                                                                                                      | 3.425 | <0.0001 | 0.01 |
| 207266_x_at  | RBMS1        | RNA binding motif, single stranded interacting protein 1                                             | 3.404 | 0.002   | 0.11 |
| 230650_at    |              |                                                                                                      | 3.397 | 0.002   | 0.1  |
| 209460_at    | ABAT         | 4-aminobutyrate aminotransferase                                                                     | 3.384 | <0.0001 | 0.05 |
| 228551_at    | DENND5B      | DENN/MADD domain containing 5B                                                                       | 3.38  | 0.004   | 0.15 |
| 221561_at    | SOAT1        | sterol O-acyltransferase 1                                                                           | 3.331 | 0.006   | 0.17 |
| 225984_at    | PRKAA1       | protein kinase, AMP-activated, alpha 1 catalytic subunit                                             | 3.33  | 0.001   | 0.07 |
| 219895_at    | FAM70A       | family with sequence similarity 70, member A                                                         | 3.329 | <0.0001 | 0.05 |
| 219631_at    | LRP12        | low density lipoprotein-related protein 12                                                           | 3.32  | 0.006   | 0.17 |
| 206026_s_at  | TNFAIP6      | tumor necrosis factor, alpha-induced protein 6                                                       | 3.319 | 0.001   | 0.07 |
| 209198_s_at  | SYT11        | synaptotagmin XI                                                                                     | 3.304 | 0.001   | 0.08 |
| 244706_at    | PCMTD1       | protein-L-isoaspartate (D-aspartate) O-methyltransferase domain containing 1                         | 3.303 | 0.001   | 0.08 |
| 204497_at    | ADCY9        | adenylate cyclase 9                                                                                  | 3.302 | 0.001   | 0.09 |
| 227611_at    | TARSL2       | threonyl-tRNA synthetase-like 2                                                                      | 3.299 | 0.001   | 0.09 |
| 226122_at    | PLEKHG1      | pleckstrin homology domain containing, family G (with RhoGef domain) member 1                        | 3.298 | 0.002   | 0.11 |
| 243871_at    | LOC100130476 | similar to hCG2036711                                                                                | 3.295 | 0.001   | 0.08 |
| 212867_at    |              |                                                                                                      | 3.284 | 0.006   | 0.17 |
| 218842_at    | RPAP3        | RNA polymerase II associated protein 3                                                               | 3.282 | 0.001   | 0.08 |
| 203789_s_at  | SEMA3C       | sema domain, immunoglobulin domain (Ig), short basic domain, secreted, (semaphorin) 3C               | 3.246 | <0.0001 | 0.06 |
| 218596_at    | TBC1D13      | TBC1 domain family, member 13                                                                        | 3.245 | 0.008   | 0.19 |
| 1555274_a_at | SELI         | selenoprotein I                                                                                      | 3.242 | 0.006   | 0.17 |
| 209943_at    | FBXL4        | F-box and leucine-rich repeat protein 4                                                              | 3.238 | <0.0001 | 0.04 |
| 200887_s_at  | STAT1        | signal transducer and activator of transcription 1, 91kDa                                            | 3.236 | 0.007   | 0.18 |
| 226045_at    | FRS2         | fibroblast growth factor receptor substrate 2                                                        | 3.236 | 0.006   | 0.17 |
| 219629_at    | FAM118A      | family with sequence similarity 118, member A                                                        | 3.231 | 0.005   | 0.16 |
| 211269_s_at  | IL2RA        | interleukin 2 receptor, alpha                                                                        | 3.204 | 0.001   | 0.08 |



|              |           |                                                                                          |       |         |      |
|--------------|-----------|------------------------------------------------------------------------------------------|-------|---------|------|
| 212750_at    | PPP1R16B  | protein phosphatase 1, regulatory (inhibitor) subunit 16B                                | 3.199 | 0.006   | 0.17 |
| 209868_s_at  | RBMS1     | RNA binding motif, single stranded interacting protein 1                                 | 3.198 | 0.006   | 0.16 |
| 202269_x_at  | GBP1      | guanylate binding protein 1, interferon-inducible, 67kDa                                 | 3.17  | 0.008   | 0.19 |
| 230362_at    | INPP5F    | inositol polyphosphate-5-phosphatase F                                                   | 3.157 | 0.002   | 0.1  |
| 208962_s_at  | FADS1     | fatty acid desaturase 1                                                                  | 3.152 | 0.001   | 0.09 |
| 215388_s_at  |           |                                                                                          | 3.152 | 0.003   | 0.13 |
| 1569183_a_at | CHM       | choroideremia (Rab escort protein 1)                                                     | 3.146 | 0.005   | 0.16 |
| 213268_at    | CAMTA1    | calmodulin binding transcription activator 1                                             | 3.138 | <0.0001 | 0.03 |
| 235683_at    | SESN3     | sestrin 3                                                                                | 3.137 | <0.0001 | 0.06 |
| 205992_s_at  | IL15      | interleukin 15                                                                           | 3.131 | 0.004   | 0.15 |
| 1552644_a_at | PHC3      | polyhomeotic homolog 3 (Drosophila)                                                      | 3.108 | 0.002   | 0.11 |
| 226251_at    | ASXL2     | additional sex combs like 2 (Drosophila)                                                 | 3.095 | 0.003   | 0.14 |
| 211776_s_at  | EPB41L3   | erythrocyte membrane protein band 4.1-like 3                                             | 3.091 | <0.0001 | 0.02 |
| 212741_at    | MAOA      | monoamine oxidase A                                                                      | 3.089 | 0.004   | 0.15 |
| 229487_at    | EBF1      | early B-cell factor 1                                                                    | 3.089 | <0.0001 | 0.04 |
| 206877_at    | MXD1      | MAX dimerization protein 1                                                               | 3.086 | 0.004   | 0.15 |
| 235231_at    | ZNF789    | zinc finger protein 789                                                                  | 3.086 | <0.0001 | 0.06 |
| 227395_at    | TBCEL     | tubulin folding cofactor E-like                                                          | 3.074 | 0.003   | 0.12 |
| 203943_at    | KIF3B     | kinesin family member 3B                                                                 | 3.059 | <0.0001 | 0.03 |
| 228083_at    | CACNA2D4  | calcium channel, voltage-dependent, alpha 2/delta subunit 4                              | 3.058 | 0.001   | 0.07 |
| 218911_at    | YEATS4    | YEATS domain containing 4                                                                | 3.05  | 0.001   | 0.09 |
| 228386_s_at  | DDX59     | DEAD (Asp-Glu-Ala-Asp) box polypeptide 59                                                | 3.05  | 0.003   | 0.13 |
| 244461_at    | CYT5B     | cytospin B                                                                               | 3.049 | 0.004   | 0.14 |
| 1555689_at   | CD80      | CD80 molecule                                                                            | 3.04  | 0.006   | 0.17 |
| 230015_at    | PRCD      | progressive rod-cone degeneration                                                        | 3.039 | 0.006   | 0.17 |
| 212397_at    | RDX       | radixin                                                                                  | 3.032 | <0.0001 | 0.02 |
| 219584_at    | PLA1A     | phospholipase A1 member A                                                                | 3.032 | <0.0001 | 0.05 |
| 218445_at    | H2AFY2    | H2A histone family, member Y2                                                            | 3.028 | 0.001   | 0.08 |
| 229064_s_at  | RCAN3     | RCAN family member 3                                                                     | 3.025 | <0.0001 | 0.05 |
| 202540_s_at  | HMGCR     | 3-hydroxy-3-methylglutaryl-Coenzyme A reductase                                          | 3.022 | 0.001   | 0.07 |
| 235707_at    | LOC221710 | hypothetical protein LOC221710                                                           | 3.019 | 0.005   | 0.15 |
| 221962_s_at  | UBE2H     | ubiquitin-conjugating enzyme E2H (UBC8 homolog, yeast)                                   | 3.009 | 0.004   | 0.15 |
| 230256_at    | C1orf104  | chromosome 1 open reading frame 104                                                      | 3.005 | 0.006   | 0.17 |
| 209649_at    | STAM2     | signal transducing adaptor molecule (SH3 domain and ITAM motif) 2                        | 3.002 | 0.007   | 0.18 |
| 217767_at    | C3        | complement component 3                                                                   | 3.002 | 0.002   | 0.1  |
| 235051_at    | CCDC50    | coiled-coil domain containing 50                                                         | 2.982 | 0.004   | 0.15 |
| 241435_at    |           |                                                                                          | 2.968 | 0.008   | 0.19 |
| 221828_s_at  | FAM125B   | family with sequence similarity 125, member B                                            | 2.964 | 0.002   | 0.11 |
| 52975_at     | FAM125B   | family with sequence similarity 125, member B                                            | 2.962 | 0.001   | 0.09 |
| 225837_at    | C12orf32  | chromosome 12 open reading frame 32                                                      | 2.961 | <0.0001 | 0.05 |
| 219501_at    | ENOX1     | ecto-NOX disulfide-thiol exchanger 1                                                     | 2.959 | <0.0001 | 0.06 |
| 46665_at     | SEMA4C    | sema domain, immunoglobulin domain (Ig), transmembrane domain (TM) and short cytoplasmic | 2.945 | 0.001   | 0.09 |

|             |           | domain, (semaphorin) 4C                                                                           |       |         |      |
|-------------|-----------|---------------------------------------------------------------------------------------------------|-------|---------|------|
| 203685_at   | BCL2      | B-cell CLL/lymphoma 2                                                                             | 2.944 | <0.0001 | 0.03 |
| 242181_at   |           |                                                                                                   | 2.935 | 0.006   | 0.17 |
| 210375_at   | PTGER3    | prostaglandin E receptor 3 (subtype EP3)                                                          | 2.931 | 0.002   | 0.1  |
| 204584_at   | L1CAM     | L1 cell adhesion molecule                                                                         | 2.922 | 0.003   | 0.13 |
| 209686_at   | S100B     | S100 calcium binding protein B                                                                    | 2.921 | 0.007   | 0.17 |
| 223465_at   | COL4A3BP  | collagen, type IV, alpha 3 (Goodpasture antigen) binding protein                                  | 2.912 | 0.006   | 0.17 |
| 226962_at   | ZBTB41    | zinc finger and BTB domain containing 41                                                          | 2.911 | 0.005   | 0.16 |
| 221449_s_at | ITFG1     | integrin alpha FG-GAP repeat containing 1                                                         | 2.908 | 0.006   | 0.17 |
| 225888_at   | C12orf30  | chromosome 12 open reading frame 30                                                               | 2.898 | 0.008   | 0.18 |
| 204301_at   | KBTBD11   | kelch repeat and BTB (POZ) domain containing 11                                                   | 2.89  | 0.008   | 0.19 |
| 204935_at   | PTPN2     | protein tyrosine phosphatase, non-receptor type 2                                                 | 2.888 | <0.0001 | 0.04 |
| 224359_s_at | HOOK3     | hook homolog 3 (Drosophila)                                                                       | 2.881 | 0.002   | 0.11 |
| 220984_s_at | SLCO5A1   | solute carrier organic anion transporter family, member 5A1                                       | 2.869 | <0.0001 | 0.04 |
| 229865_at   | FNDC3B    | fibronectin type III domain containing 3B                                                         | 2.859 | 0.007   | 0.18 |
| 204642_at   | S1PR1     | sphingosine-1-phosphate receptor 1                                                                | 2.856 | 0.001   | 0.09 |
| 244487_at   |           |                                                                                                   | 2.855 | 0.008   | 0.19 |
| 214455_at   | HIST1H2BC | histone cluster 1, H2bc                                                                           | 2.844 | 0.001   | 0.09 |
| 241379_at   | APLF      | aprataxin and PNKP like factor                                                                    | 2.835 | 0.001   | 0.07 |
| 228829_at   | ATF7      | activating transcription factor 7                                                                 | 2.831 | 0.003   | 0.13 |
| 1558102_at  |           |                                                                                                   | 2.83  | 0.002   | 0.1  |
| 227481_at   | CNKSR3    | CNKSR family member 3                                                                             | 2.828 | 0.002   | 0.11 |
| 214681_at   | GK        | glycerol kinase                                                                                   | 2.827 | 0.002   | 0.11 |
| 44696_at    | TBC1D13   | TBC1 domain family, member 13                                                                     | 2.825 | 0.003   | 0.13 |
| 213454_at   |           |                                                                                                   | 2.823 | 0.001   | 0.07 |
| 203748_x_at | RBMS1     | RNA binding motif, single stranded interacting protein 1                                          | 2.821 | 0.003   | 0.12 |
| 203379_at   | RPS6KA1   | ribosomal protein S6 kinase, 90kDa, polypeptide 1                                                 | 2.818 | 0.001   | 0.08 |
| 238335_at   | DNAJC21   | DnaJ (Hsp40) homolog, subfamily C, member 21                                                      | 2.818 | 0.001   | 0.07 |
| 219321_at   | MPP5      | membrane protein, palmitoylated 5 (MAGUK p55 subfamily member 5)                                  | 2.815 | 0.001   | 0.09 |
| 209360_s_at | RUNX1     | runt-related transcription factor 1                                                               | 2.811 | 0.003   | 0.13 |
| 210950_s_at | FDFT1     | farnesyl-diphosphate farnesyltransferase 1                                                        | 2.801 | 0.001   | 0.08 |
| 209037_s_at | EHD1      | EH-domain containing 1                                                                            | 2.8   | 0.001   | 0.07 |
| 226632_at   | CYGB      | cytoglobin                                                                                        | 2.795 | <0.0001 | 0.06 |
| 228983_at   |           |                                                                                                   | 2.79  | 0.008   | 0.19 |
| 204421_s_at | FGF2      | fibroblast growth factor 2 (basic)                                                                | 2.788 | 0.002   | 0.1  |
| 205401_at   | AGPS      | alkylglycerone phosphate synthase                                                                 | 2.779 | 0.001   | 0.09 |
| 216693_x_at | HDGFRP3   | hepatoma-derived growth factor, related protein 3                                                 | 2.778 | 0.001   | 0.09 |
| 203159_at   | GLS       | glutaminase                                                                                       | 2.777 | 0.001   | 0.09 |
| 201063_at   | RCN1      | reticulocalbin 1, EF-hand calcium binding domain                                                  | 2.774 | 0.001   | 0.08 |
| 213437_at   | RUFY3     | RUN and FYVE domain containing 3                                                                  | 2.768 | <0.0001 | 0.05 |
| 225113_at   | AGPS      | alkylglycerone phosphate synthase                                                                 | 2.762 | 0.001   | 0.08 |
| 215294_s_at | SMARCA1   | SWI/SNF related, matrix associated, actin dependent regulator of chromatin, subfamily a, member 1 | 2.759 | 0.003   | 0.13 |

|             |           |                                                                                                                                     |       |         |      |
|-------------|-----------|-------------------------------------------------------------------------------------------------------------------------------------|-------|---------|------|
| 213353_at   | ABCA5     | ATP-binding cassette, sub-family A (ABC1), member 5                                                                                 | 2.758 | 0.001   | 0.08 |
| 207387_s_at | GK        | glycerol kinase                                                                                                                     | 2.757 | 0.001   | 0.08 |
| 209526_s_at | HDGFRP3   | hepatoma-derived growth factor, related protein 3                                                                                   | 2.751 | 0.004   | 0.15 |
| 202245_at   | LSS       | lanosterol synthase (2,3-oxidosqualene-lanosterol cyclase)                                                                          | 2.745 | 0.002   | 0.1  |
| 202886_s_at | PPP2R1B   | protein phosphatase 2 (formerly 2A), regulatory subunit A, beta isoform                                                             | 2.743 | <0.0001 | 0.04 |
| 222514_at   | RRAGC     | Ras-related GTP binding C                                                                                                           | 2.737 | 0.001   | 0.09 |
| 218502_s_at | TRPS1     | trichorhinophalangeal syndrome I                                                                                                    | 2.736 | 0.003   | 0.13 |
| 205026_at   | STAT5B    | signal transducer and activator of transcription 5B                                                                                 | 2.732 | 0.005   | 0.16 |
| 218656_s_at | LHFP      | lipoma HMGIC fusion partner                                                                                                         | 2.732 | 0.005   | 0.16 |
| 239559_at   |           |                                                                                                                                     | 2.732 | 0.007   | 0.18 |
| 203275_at   | IRF2      | interferon regulatory factor 2                                                                                                      | 2.728 | <0.0001 | 0.03 |
| 207956_x_at | PDS5B     | PDS5, regulator of cohesion maintenance, homolog B (S. cerevisiae)                                                                  | 2.727 | <0.0001 | 0.01 |
| 226089_at   | RABL3     | RAB, member of RAS oncogene family-like 3                                                                                           | 2.725 | <0.0001 | 0.05 |
| 242023_at   | ABHD4     | abhydrolase domain containing 4                                                                                                     | 2.724 | <0.0001 | 0.01 |
| 221752_at   | SSH1      | slingshot homolog 1 (Drosophila)                                                                                                    | 2.717 | 0.001   | 0.08 |
| 218627_at   | DRAM1     | DNA-damage regulated autophagy modulator 1                                                                                          | 2.702 | <0.0001 | 0.05 |
| 203869_at   | USP46     | ubiquitin specific peptidase 46                                                                                                     | 2.696 | 0.008   | 0.19 |
| 202763_at   | CASP3     | caspase 3, apoptosis-related cysteine peptidase                                                                                     | 2.695 | <0.0001 | 0.02 |
| 225078_at   | EMP2      | epithelial membrane protein 2                                                                                                       | 2.693 | 0.004   | 0.14 |
| 219649_at   | ALG6      | asparagine-linked glycosylation 6, alpha-1,3-glucosyltransferase homolog (S. cerevisiae)                                            | 2.692 | 0.005   | 0.16 |
| 229844_at   |           |                                                                                                                                     | 2.69  | 0.005   | 0.16 |
| 204866_at   | PHF16     | PHD finger protein 16                                                                                                               | 2.684 | 0.006   | 0.17 |
| 221564_at   | PRMT2     | protein arginine methyltransferase 2                                                                                                | 2.677 | 0.001   | 0.07 |
| 203117_s_at | PAN2      | PAN2 poly(A) specific ribonuclease subunit homolog (S. cerevisiae)                                                                  | 2.676 | <0.0001 | 0.06 |
| 238035_at   | SP3       | Sp3 transcription factor                                                                                                            | 2.675 | <0.0001 | 0.03 |
| 211786_at   | TNFRSF9   | tumor necrosis factor receptor superfamily, member 9                                                                                | 2.665 | <0.0001 | 0.03 |
| 36564_at    | RNF19B    | ring finger protein 19B                                                                                                             | 2.665 | 0.008   | 0.19 |
| 1560520_at  | LOC401312 | hypothetical LOC401312                                                                                                              | 2.66  | 0.005   | 0.16 |
| 236140_at   | GCLM      | glutamate-cysteine ligase, modifier subunit                                                                                         | 2.657 | 0.006   | 0.17 |
| 221935_s_at | C3orf64   | chromosome 3 open reading frame 64                                                                                                  | 2.654 | 0.004   | 0.15 |
| 227638_at   | KIAA1632  | KIAA1632                                                                                                                            | 2.649 | 0.003   | 0.13 |
| 202176_at   | ERCC3     | excision repair cross-complementing rodent repair deficiency, complementation group 3 (xeroderma pigmentosum group B complementing) | 2.648 | 0.004   | 0.15 |
| 230416_at   |           |                                                                                                                                     | 2.644 | 0.007   | 0.18 |
| 222730_s_at | ZDHHC2    | zinc finger, DHHC-type containing 2                                                                                                 | 2.641 | 0.001   | 0.08 |
| 225331_at   | CCDC50    | coiled-coil domain containing 50                                                                                                    | 2.631 | <0.0001 | 0.02 |
| 202321_at   | GGPS1     | geranylgeranyl diphosphate synthase 1                                                                                               | 2.628 | 0.005   | 0.16 |
| 214887_at   | N4BP2L1   | NEDD4 binding protein 2-like 1                                                                                                      | 2.619 | 0.005   | 0.16 |
| 200770_s_at | LAMC1     | laminin, gamma 1 (formerly LAMB2)                                                                                                   | 2.618 | 0.001   | 0.09 |
| 217197_x_at | N4BP2L1   | NEDD4 binding protein 2-like 1                                                                                                      | 2.613 | <0.0001 | 0.06 |
| 218816_at   | LRRC1     | leucine rich repeat containing 1                                                                                                    | 2.61  | 0.005   | 0.15 |
| 1553954_at  | ALG14     | asparagine-linked glycosylation 14 homolog (S. cerevisiae)                                                                          | 2.599 | <0.0001 | 0.05 |

|              |           |                                                                                                      |       |         |      |
|--------------|-----------|------------------------------------------------------------------------------------------------------|-------|---------|------|
| 202924_s_at  | PLAGL2    | pleiomorphic adenoma gene-like 2                                                                     | 2.592 | 0.003   | 0.12 |
| 226264_at    | SUSD1     | sushi domain containing 1                                                                            | 2.586 | <0.0001 | 0.05 |
| 220999_s_at  | CYFIP2    | cytoplasmic FMR1 interacting protein 2                                                               | 2.583 | 0.001   | 0.09 |
| 212956_at    | TBC1D9    | TBC1 domain family, member 9 (with GRAM domain)                                                      | 2.582 | 0.007   | 0.17 |
| 204037_at    | LPAR1     | lysophosphatidic acid receptor 1                                                                     | 2.581 | 0.001   | 0.09 |
| 228486_at    | SLC44A1   | solute carrier family 44, member 1                                                                   | 2.576 | <0.0001 | 0.05 |
| 223250_at    | KLHL7     | kelch-like 7 (Drosophila)                                                                            | 2.569 | 0.001   | 0.08 |
| 212623_at    | TMEM41B   | transmembrane protein 41B                                                                            | 2.565 | 0.008   | 0.19 |
| 222209_s_at  | TMEM135   | transmembrane protein 135                                                                            | 2.565 | 0.001   | 0.09 |
| 204675_at    | SRD5A1    | steroid-5-alpha-reductase, alpha polypeptide 1 (3-oxo-5 alpha-steroid delta 4-dehydrogenase alpha 1) | 2.564 | <0.0001 | 0.03 |
| 210277_at    | AP4S1     | adaptor-related protein complex 4, sigma 1 subunit                                                   | 2.564 | 0.001   | 0.07 |
| 206412_at    | FER       | fer (fps/fes related) tyrosine kinase                                                                | 2.555 | 0.001   | 0.08 |
| 204036_at    | LPAR1     | lysophosphatidic acid receptor 1                                                                     | 2.554 | 0.007   | 0.17 |
| 243016_at    |           |                                                                                                      | 2.536 | 0.005   | 0.16 |
| 214632_at    | NRP2      | neuropilin 2                                                                                         | 2.534 | 0.004   | 0.15 |
| 202074_s_at  | OPTN      | optineurin                                                                                           | 2.531 | 0.001   | 0.08 |
| 203336_s_at  | ITGB1BP1  | integrin beta 1 binding protein 1                                                                    | 2.531 | 0.001   | 0.08 |
| 200974_at    | ACTA2     | actin, alpha 2, smooth muscle, aorta                                                                 | 2.53  | 0.002   | 0.12 |
| 226189_at    | ITGB8     | integrin, beta 8                                                                                     | 2.522 | 0.001   | 0.07 |
| 213038_at    | RNF19B    | ring finger protein 19B                                                                              | 2.521 | 0.005   | 0.16 |
| 218992_at    | C9orf46   | chromosome 9 open reading frame 46                                                                   | 2.517 | 0.005   | 0.16 |
| 209271_at    | BPTF      | bromodomain PHD finger transcription factor                                                          | 2.515 | <0.0001 | 0.05 |
| 218079_s_at  | GGNBP2    | gametogenetin binding protein 2                                                                      | 2.512 | 0.003   | 0.13 |
| 214860_at    | SLC9A7    | solute carrier family 9 (sodium/hydrogen exchanger), member 7                                        | 2.509 | <0.0001 | 0.03 |
| 220987_s_at  |           |                                                                                                      | 2.508 | 0.003   | 0.13 |
| 212526_at    | SPG20     | spastic paraplegia 20 (Troyer syndrome)                                                              | 2.507 | <0.0001 | 0.04 |
| 1556378_a_at | LOC440896 | hypothetical LOC440896                                                                               | 2.501 | 0.004   | 0.15 |
| 220672_at    | PPP4R4    | protein phosphatase 4, regulatory subunit 4                                                          | 2.5   | 0.004   | 0.15 |
| 202562_s_at  | C14orf1   | chromosome 14 open reading frame 1                                                                   | 2.499 | 0.002   | 0.11 |
| 220636_at    | DNAI2     | dynein, axonemal, intermediate chain 2                                                               | 2.498 | 0.008   | 0.19 |
| 235625_at    | VPS41     | vacuolar protein sorting 41 homolog (S. cerevisiae)                                                  | 2.495 | <0.0001 | 0.06 |
| 217540_at    | FAM55C    | family with sequence similarity 55, member C                                                         | 2.493 | 0.006   | 0.17 |
| 235938_at    |           |                                                                                                      | 2.486 | 0.007   | 0.18 |
| 210849_s_at  | VPS41     | vacuolar protein sorting 41 homolog (S. cerevisiae)                                                  | 2.485 | <0.0001 | 0.06 |
| 221685_s_at  | CCDC99    | coiled-coil domain containing 99                                                                     | 2.485 | 0.001   | 0.09 |
| 204369_at    | PIK3CA    | phosphoinositide-3-kinase, catalytic, alpha polypeptide                                              | 2.484 | 0.003   | 0.12 |
| 238950_at    |           |                                                                                                      | 2.478 | 0.005   | 0.16 |
| 204618_s_at  | GABPB1    | GA binding protein transcription factor, beta subunit 1                                              | 2.477 | 0.005   | 0.15 |
| 224596_at    | SLC44A1   | solute carrier family 44, member 1                                                                   | 2.477 | 0.001   | 0.08 |
| 214830_at    | SLC38A6   | solute carrier family 38, member 6                                                                   | 2.475 | 0.003   | 0.14 |
| 203925_at    | GCLM      | glutamate-cysteine ligase, modifier subunit                                                          | 2.474 | 0.002   | 0.11 |
| 1556194_a_at |           |                                                                                                      | 2.472 | 0.004   | 0.14 |

|              |           |                                                                                  |       |         |      |
|--------------|-----------|----------------------------------------------------------------------------------|-------|---------|------|
| 213149_at    | DLAT      | dihydrolipoamide S-acetyltransferase                                             | 2.472 | 0.002   | 0.11 |
| 209338_at    | TFCP2     | transcription factor CP2                                                         | 2.471 | 0.004   | 0.15 |
| 202529_at    | PRPSAP1   | phosphoribosyl pyrophosphate synthetase-associated protein 1                     | 2.469 | 0.001   | 0.08 |
| 203716_s_at  | DPP4      | dipeptidyl-peptidase 4                                                           | 2.466 | 0.004   | 0.15 |
| 224436_s_at  | NIPSNAP3A | nipsnap homolog 3A (C. elegans)                                                  | 2.463 | 0.002   | 0.11 |
| 216060_s_at  | DAAM1     | dishevelled associated activator of morphogenesis 1                              | 2.462 | 0.001   | 0.09 |
| 201619_at    | PRDX3     | peroxiredoxin 3                                                                  | 2.457 | 0.004   | 0.15 |
| 200771_at    | LAMC1     | laminin, gamma 1 (formerly LAMB2)                                                | 2.455 | 0.004   | 0.15 |
| 219904_at    | ZSCAN5A   | zinc finger and SCAN domain containing 5A                                        | 2.455 | 0.006   | 0.17 |
| 209043_at    | PAPSS1    | 3'-phosphoadenosine 5'-phosphosulfate synthase 1                                 | 2.449 | 0.001   | 0.08 |
| 221751_at    | SLC2A3P1  | solute carrier family 2 (facilitated glucose transporter), member 3 pseudogene 1 | 2.44  | 0.004   | 0.15 |
| 202625_at    | LYN       | v-src-1 Yamaguchi sarcoma viral related oncogene homolog                         | 2.434 | <0.0001 | 0.02 |
| 1405_i_at    | CCL5      | chemokine (C-C motif) ligand 5                                                   | 2.431 | 0.007   | 0.17 |
| 230363_s_at  | INPP5F    | inositol polyphosphate-5-phosphatase F                                           | 2.43  | <0.0001 | 0.06 |
| 1552486_s_at | LACTB     | lactamase, beta                                                                  | 2.428 | 0.006   | 0.17 |
| 230446_at    |           |                                                                                  | 2.426 | 0.001   | 0.08 |
| 211018_at    | LSS       | lanosterol synthase (2,3-oxidosqualene-lanosterol cyclase)                       | 2.421 | 0.004   | 0.15 |
| 217762_s_at  | RAB31     | RAB31, member RAS oncogene family                                                | 2.421 | 0.001   | 0.08 |
| 235310_at    | GCET2     | germinal center expressed transcript 2                                           | 2.419 | 0.001   | 0.08 |
| 1555370_a_at | CAMTA1    | calmodulin binding transcription activator 1                                     | 2.417 | 0.006   | 0.17 |
| 201559_s_at  | CLIC4     | chloride intracellular channel 4                                                 | 2.415 | <0.0001 | 0.06 |
| 225585_at    | RAP2A     | RAP2A, member of RAS oncogene family                                             | 2.415 | <0.0001 | 0.04 |
| 235457_at    | MAML2     | mastermind-like 2 (Drosophila)                                                   | 2.411 | 0.007   | 0.18 |
| 221830_at    | RAP2A     | RAP2A, member of RAS oncogene family                                             | 2.408 | <0.0001 | 0.02 |
| 227816_at    | NTN1      | netrin 1                                                                         | 2.407 | 0.001   | 0.08 |
| 210473_s_at  | GPR125    | G protein-coupled receptor 125                                                   | 2.406 | 0.006   | 0.17 |
| 225859_at    | XIAP      | X-linked inhibitor of apoptosis                                                  | 2.406 | 0.004   | 0.14 |
| 232267_at    | GPR133    | G protein-coupled receptor 133                                                   | 2.4   | 0.002   | 0.11 |
| 204067_at    | SUOX      | sulfite oxidase                                                                  | 2.399 | 0.006   | 0.17 |
| 224603_at    |           |                                                                                  | 2.398 | 0.002   | 0.11 |
| 206385_s_at  | ANK3      | ankyrin 3, node of Ranvier (ankyrin G)                                           | 2.397 | 0.003   | 0.13 |
| 223400_s_at  | PBRM1     | polybromo 1                                                                      | 2.396 | 0.006   | 0.17 |
| 213393_at    | MFSD9     | major facilitator superfamily domain containing 9                                | 2.395 | <0.0001 | 0.05 |
| 232539_at    |           |                                                                                  | 2.391 | 0.007   | 0.18 |
| 214672_at    | TTLL5     | tubulin tyrosine ligase-like family, member 5                                    | 2.387 | 0.001   | 0.08 |
| 212681_at    | EPB41L3   | erythrocyte membrane protein band 4.1-like 3                                     | 2.384 | 0.006   | 0.17 |
| 208881_x_at  | IDI1      | isopentenyl-diphosphate delta isomerase 1                                        | 2.383 | 0.002   | 0.12 |
| 226685_at    | SNTB2     | syntrophin, beta 2 (dystrophin-associated protein A1, 59kDa, basic component 2)  | 2.382 | 0.001   | 0.08 |
| 223276_at    | MST150    | MSTP150                                                                          | 2.38  | <0.0001 | 0.06 |
| 201537_s_at  | DUSP3     | dual specificity phosphatase 3                                                   | 2.378 | 0.001   | 0.09 |
| 209442_x_at  | ANK3      | ankyrin 3, node of Ranvier (ankyrin G)                                           | 2.378 | 0.004   | 0.15 |
| 211488_s_at  | ITGB8     | integrin, beta 8                                                                 | 2.378 | 0.006   | 0.17 |

|              |           |                                                                                               |       |         |      |
|--------------|-----------|-----------------------------------------------------------------------------------------------|-------|---------|------|
| 226190_at    |           |                                                                                               | 2.367 | 0.001   | 0.08 |
| 1555638_a_at | SAMSN1    | SAM domain, SH3 domain and nuclear localization signals 1                                     | 2.361 | 0.001   | 0.07 |
| 226713_at    | CCDC50    | coiled-coil domain containing 50                                                              | 2.354 | 0.007   | 0.18 |
| 226270_at    | EXOC2     | exocyst complex component 2                                                                   | 2.352 | 0.002   | 0.1  |
| 227940_at    | LOC339803 | hypothetical protein LOC339803                                                                | 2.351 | 0.005   | 0.16 |
| 202158_s_at  | CUGBP2    | CUG triplet repeat, RNA binding protein 2                                                     | 2.349 | 0.003   | 0.14 |
| 239250_at    | ZNF542    | zinc finger protein 542                                                                       | 2.346 | 0.008   | 0.19 |
| 205411_at    | STK4      | serine/threonine kinase 4                                                                     | 2.345 | <0.0001 | 0.04 |
| 224484_s_at  | BRMS1L    | breast cancer metastasis-suppressor 1-like                                                    | 2.342 | 0.003   | 0.14 |
| 225836_s_at  | C12orf32  | chromosome 12 open reading frame 32                                                           | 2.34  | 0.003   | 0.12 |
| 226468_at    |           |                                                                                               | 2.336 | 0.002   | 0.1  |
| 202599_s_at  | NRIP1     | nuclear receptor interacting protein 1                                                        | 2.334 | 0.001   | 0.07 |
| 203414_at    | MMD       | monocyte to macrophage differentiation-associated                                             | 2.332 | 0.001   | 0.08 |
| 213361_at    | TDRD7     | tudor domain containing 7                                                                     | 2.331 | 0.001   | 0.08 |
| 223268_at    | C11orf54  | chromosome 11 open reading frame 54                                                           | 2.331 | 0.005   | 0.16 |
| 230536_at    | PBX4      | pre-B-cell leukemia homeobox 4                                                                | 2.331 | 0.001   | 0.1  |
| 226726_at    | MBOAT2    | membrane bound O-acyltransferase domain containing 2                                          | 2.328 | <0.0001 | 0.03 |
| 242329_at    |           |                                                                                               | 2.328 | 0.003   | 0.13 |
| 203315_at    | NCK2      | NCK adaptor protein 2                                                                         | 2.326 | <0.0001 | 0.02 |
| 228667_at    | AGPAT4    | 1-acylglycerol-3-phosphate O-acyltransferase 4 (lysophosphatidic acid acyltransferase, delta) | 2.326 | 0.005   | 0.16 |
| 203087_s_at  | KIF2A     | kinesin heavy chain member 2A                                                                 | 2.323 | 0.001   | 0.1  |
| 208315_x_at  | TRAF3     | TNF receptor-associated factor 3                                                              | 2.322 | <0.0001 | 0.02 |
| 222735_at    | TMEM38B   | transmembrane protein 38B                                                                     | 2.322 | 0.007   | 0.18 |
| 221750_at    | HMGCS1    | 3-hydroxy-3-methylglutaryl-Coenzyme A synthase 1 (soluble)                                    | 2.318 | 0.001   | 0.09 |
| 227802_at    | RUFY3     | RUN and FYVE domain containing 3                                                              | 2.318 | 0.002   | 0.1  |
| 227231_at    | KIAA1211  | KIAA1211                                                                                      | 2.317 | 0.005   | 0.15 |
| 1554569_a_at | CUGBP2    | CUG triplet repeat, RNA binding protein 2                                                     | 2.315 | 0.001   | 0.08 |
| 219279_at    | DOCK10    | dedicator of cytokinesis 10                                                                   | 2.312 | 0.001   | 0.08 |
| 224990_at    | C4orf34   | chromosome 4 open reading frame 34                                                            | 2.312 | 0.003   | 0.13 |
| 220649_at    | AGBL3     | ATP/GTP binding protein-like 3                                                                | 2.309 | 0.003   | 0.13 |
| 226853_at    | BMP2K     | BMP2 inducible kinase                                                                         | 2.304 | 0.002   | 0.11 |
| 33494_at     | ETFDH     | electron-transferring-flavoprotein dehydrogenase                                              | 2.302 | 0.002   | 0.11 |
| 226046_at    | MAPK8     | mitogen-activated protein kinase 8                                                            | 2.298 | 0.003   | 0.13 |
| 1568957_x_at | SRGAP2P1  | SLIT-ROBO Rho GTPase activating protein 2 pseudogene 1                                        | 2.292 | 0.006   | 0.17 |
| 224504_s_at  | BUD13     | BUD13 homolog (S. cerevisiae)                                                                 | 2.291 | 0.003   | 0.12 |
| 228954_at    | LYSMD4    | LysM, putative peptidoglycan-binding, domain containing 4                                     | 2.288 | 0.001   | 0.08 |
| 243894_at    | SLC41A2   | solute carrier family 41, member 2                                                            | 2.288 | 0.005   | 0.15 |
| 227840_at    | C2orf76   | chromosome 2 open reading frame 76                                                            | 2.279 | 0.005   | 0.16 |
| 209481_at    | SNRK      | SNF related kinase                                                                            | 2.278 | 0.007   | 0.17 |
| 214906_x_at  | N4BP2L1   | NEDD4 binding protein 2-like 1                                                                | 2.275 | 0.003   | 0.13 |
| 217986_s_at  | BAZ1A     | bromodomain adjacent to zinc finger domain, 1A                                                | 2.274 | 0.008   | 0.19 |
| 225594_at    | CREBZF    | CREB/ATF bZIP transcription factor                                                            | 2.273 | 0.004   | 0.14 |

|              |            |                                                                                                                  |       |         |      |
|--------------|------------|------------------------------------------------------------------------------------------------------------------|-------|---------|------|
| 228243_at    |            |                                                                                                                  | 2.273 | 0.001   | 0.07 |
| 219499_at    | SEC61A2    | Sec61 alpha 2 subunit ( <i>S. cerevisiae</i> )                                                                   | 2.272 | 0.001   | 0.08 |
| 243601_at    | LOC285957  | hypothetical protein LOC285957                                                                                   | 2.27  | 0.005   | 0.16 |
| 219551_at    | EAF2       | ELL associated factor 2                                                                                          | 2.263 | <0.0001 | 0.04 |
| 239277_at    |            |                                                                                                                  | 2.261 | 0.003   | 0.13 |
| 219366_at    | AVEN       | apoptosis, caspase activation inhibitor                                                                          | 2.26  | 0.004   | 0.14 |
| 223498_at    | CYTSB      | cytospin B                                                                                                       | 2.257 | 0.005   | 0.15 |
| 223351_at    | C17orf80   | chromosome 17 open reading frame 80                                                                              | 2.256 | 0.005   | 0.16 |
| 211763_s_at  | UBE2B      | ubiquitin-conjugating enzyme E2B (RAD6 homolog)                                                                  | 2.255 | 0.004   | 0.15 |
| 1563111_a_at | PIGX       | phosphatidylinositol glycan anchor biosynthesis, class X                                                         | 2.251 | <0.0001 | 0.06 |
| 239186_at    | MGC39372   | hypothetical protein MGC39372                                                                                    | 2.251 | 0.008   | 0.19 |
| 239431_at    | TICAM2     | toll-like receptor adaptor molecule 2                                                                            | 2.25  | <0.0001 | 0.06 |
| 228042_at    | ADPRH      | ADP-ribosylarginine hydrolase                                                                                    | 2.249 | <0.0001 | 0.03 |
| 223790_at    | KATNAL1    | katanin p60 subunit A-like 1                                                                                     | 2.248 | <0.0001 | 0.04 |
| 202314_at    | CYP51A1    | cytochrome P450, family 51, subfamily A, polypeptide 1                                                           | 2.247 | <0.0001 | 0.04 |
| 226142_at    | GLIPR1     | GLI pathogenesis-related 1                                                                                       | 2.243 | 0.003   | 0.14 |
| 225023_at    | GOPC       | golgi associated PDZ and coiled-coil motif containing                                                            | 2.242 | 0.004   | 0.15 |
| 225048_at    | PHF10      | PHD finger protein 10                                                                                            | 2.24  | 0.004   | 0.15 |
| 207090_x_at  | ZFP30      | zinc finger protein 30 homolog (mouse)                                                                           | 2.239 | 0.004   | 0.15 |
| 208328_s_at  | MEF2A      | myocyte enhancer factor 2A                                                                                       | 2.237 | 0.006   | 0.17 |
| 210048_at    | NAPG       | N-ethylmaleimide-sensitive factor attachment protein, gamma                                                      | 2.236 | 0.002   | 0.11 |
| 238493_at    | ZNF506     | zinc finger protein 506                                                                                          | 2.233 | 0.005   | 0.16 |
| 204542_at    | ST6GALNAC2 | ST6 (alpha-N-acetyl-neuraminy1-2,3-beta-galactosyl-1,3)-N-acetylgalactosaminide<br>alpha-2,6-sialyltransferase 2 | 2.23  | 0.002   | 0.12 |
| 203603_s_at  | ZEB2       | zinc finger E-box binding homeobox 2                                                                             | 2.228 | 0.001   | 0.08 |
| 238336_s_at  | DNAJC21    | Dnaj (Hsp40) homolog, subfamily C, member 21                                                                     | 2.225 | 0.001   | 0.09 |
| 227637_at    | TFCP2      | transcription factor CP2                                                                                         | 2.224 | 0.003   | 0.13 |
| 208070_s_at  | REV3L      | REV3-like, catalytic subunit of DNA polymerase zeta (yeast)                                                      | 2.222 | 0.003   | 0.13 |
| 212453_at    | KIAA1279   | KIAA1279                                                                                                         | 2.22  | 0.006   | 0.17 |
| 210715_s_at  | SPINT2     | serine peptidase inhibitor, Kunitz type, 2                                                                       | 2.217 | 0.007   | 0.17 |
| 219129_s_at  | SAP30L     | SAP30-like                                                                                                       | 2.217 | 0.001   | 0.1  |
| 208875_s_at  | PAK2       | p21 protein (Cdc42/Rac)-activated kinase 2                                                                       | 2.213 | 0.007   | 0.18 |
| 1556385_at   |            |                                                                                                                  | 2.211 | <0.0001 | 0.04 |
| 236347_at    | MMAA       | methylmalonic aciduria (cobalamin deficiency) cblA type                                                          | 2.211 | 0.004   | 0.15 |
| 1554465_s_at |            |                                                                                                                  | 2.207 | 0.003   | 0.12 |
| 224831_at    | CPEB4      | cytoplasmic polyadenylation element binding protein 4                                                            | 2.207 | 0.007   | 0.18 |
| 203010_at    | STAT5A     | signal transducer and activator of transcription 5A                                                              | 2.206 | 0.001   | 0.08 |
| 231929_at    | IKZF2      | IKAROS family zinc finger 2 (Helios)                                                                             | 2.206 | 0.006   | 0.17 |
| 212742_at    | RNF115     | ring finger protein 115                                                                                          | 2.202 | 0.003   | 0.14 |
| 204500_s_at  | AGTPBP1    | ATP/GTP binding protein 1                                                                                        | 2.201 | 0.004   | 0.15 |
| 230219_at    | NDE1       | nudE nuclear distribution gene E homolog 1 ( <i>A. nidulans</i> )                                                | 2.201 | 0.001   | 0.07 |
| 211383_s_at  | WDR37      | WD repeat domain 37                                                                                              | 2.198 | 0.006   | 0.17 |

|             |           |                                                                                          |       |         |      |
|-------------|-----------|------------------------------------------------------------------------------------------|-------|---------|------|
| 204460_s_at | RAD1      | RAD1 homolog (S. pombe)                                                                  | 2.197 | 0.002   | 0.12 |
| 219358_s_at | ADAP2     | ArfGAP with dual PH domains 2                                                            | 2.195 | 0.001   | 0.09 |
| 206695_x_at | ZNF43     | zinc finger protein 43                                                                   | 2.193 | 0.007   | 0.18 |
| 220147_s_at | FAM60A    | family with sequence similarity 60, member A                                             | 2.193 | 0.003   | 0.12 |
| 227006_at   | PPP1R14A  | protein phosphatase 1, regulatory (inhibitor) subunit 14A                                | 2.193 | 0.003   | 0.13 |
| 202422_s_at | ACSL4     | acyl-CoA synthetase long-chain family member 4                                           | 2.188 | 0.009   | 0.19 |
| 231975_s_at | MIER3     | mesoderm induction early response 1, family member 3                                     | 2.187 | 0.005   | 0.15 |
| 203265_s_at | MAP2K4    | mitogen-activated protein kinase kinase 4                                                | 2.186 | 0.002   | 0.11 |
| 214684_at   | MEF2A     | myocyte enhancer factor 2A                                                               | 2.185 | 0.002   | 0.11 |
| 205801_s_at | RASGRP3   | RAS guanyl releasing protein 3 (calcium and DAG-regulated)                               | 2.181 | 0.004   | 0.14 |
| 228385_at   | DDX59     | DEAD (Asp-Glu-Ala-Asp) box polypeptide 59                                                | 2.181 | 0.005   | 0.16 |
| 212377_s_at | NOTCH2    | Notch homolog 2 (Drosophila)                                                             | 2.179 | 0.004   | 0.15 |
| 224968_at   | CCDC104   | coiled-coil domain containing 104                                                        | 2.179 | 0.001   | 0.08 |
| 203556_at   | ZHX2      | zinc fingers and homeoboxes 2                                                            | 2.174 | 0.004   | 0.15 |
| 228785_at   | ZNF281    | zinc finger protein 281                                                                  | 2.172 | 0.001   | 0.09 |
| 243350_at   |           |                                                                                          | 2.171 | 0.007   | 0.18 |
| 226725_at   |           |                                                                                          | 2.17  | 0.007   | 0.17 |
| 203598_s_at | WBP4      | WW domain binding protein 4 (formin binding protein 21)                                  | 2.165 | 0.002   | 0.11 |
| 224891_at   | FOXO3     | forkhead box O3                                                                          | 2.165 | 0.001   | 0.08 |
| 220952_s_at | PLEKHA5   | pleckstrin homology domain containing, family A member 5                                 | 2.164 | 0.007   | 0.17 |
| 204615_x_at | IDI1      | isopentenyl-diphosphate delta isomerase 1                                                | 2.163 | 0.004   | 0.15 |
| 208964_s_at | FADS1     | fatty acid desaturase 1                                                                  | 2.162 | <0.0001 | 0.06 |
| 202604_x_at | ADAM10    | ADAM metallopeptidase domain 10                                                          | 2.158 | 0.005   | 0.16 |
| 225440_at   | AGPAT3    | 1-acylglycerol-3-phosphate O-acyltransferase 3                                           | 2.158 | 0.001   | 0.09 |
| 201503_at   | G3BP1     | GTPase activating protein (SH3 domain) binding protein 1                                 | 2.153 | 0.003   | 0.14 |
| 227516_at   | SF3A1     | splicing factor 3a, subunit 1, 120kDa                                                    | 2.153 | <0.0001 | 0.05 |
| 231853_at   | TUBD1     | tubulin, delta 1                                                                         | 2.153 | 0.008   | 0.19 |
| 225829_at   | PDZD8     | PDZ domain containing 8                                                                  | 2.152 | 0.002   | 0.12 |
| 202466_at   | POLS      | polymerase (DNA directed) sigma                                                          | 2.15  | 0.001   | 0.09 |
| 201297_s_at | MOBKL1B   | MOB1, Mps One Binder kinase activator-like 1B (yeast)                                    | 2.147 | 0.001   | 0.08 |
| 221522_at   | ANKRD27   | ankyrin repeat domain 27 (VPS9 domain)                                                   | 2.146 | 0.001   | 0.09 |
| 224695_at   | C2orf29   | chromosome 2 open reading frame 29                                                       | 2.146 | 0.001   | 0.09 |
| 209608_s_at | ACAT2     | acetyl-Coenzyme A acetyltransferase 2                                                    | 2.143 | 0.008   | 0.19 |
| 216941_s_at | TAF1B     | TATA box binding protein (TBP)-associated factor, RNA polymerase I, B, 63kDa             | 2.142 | 0.004   | 0.15 |
| 232535_at   |           |                                                                                          | 2.137 | 0.002   | 0.12 |
| 223211_at   | HACL1     | 2-hydroxyacyl-CoA lyase 1                                                                | 2.135 | <0.0001 | 0.04 |
| 225123_at   |           |                                                                                          | 2.135 | <0.0001 | 0.05 |
| 227124_at   | LOC221710 | hypothetical protein LOC221710                                                           | 2.132 | 0.005   | 0.16 |
| 204715_at   | PANX1     | pannexin 1                                                                               | 2.13  | 0.001   | 0.07 |
| 205055_at   | ITGAE     | integrin, alpha E (antigen CD103, human mucosal lymphocyte antigen 1; alpha polypeptide) | 2.128 | <0.0001 | 0.06 |
| 209524_at   | HDGFRP3   | hepatoma-derived growth factor, related protein 3                                        | 2.127 | 0.003   | 0.12 |
| 212390_at   | PDE4DIP   | phosphodiesterase 4D interacting protein                                                 | 2.125 | 0.002   | 0.11 |



|             |           |                                                                                          |       |         |      |
|-------------|-----------|------------------------------------------------------------------------------------------|-------|---------|------|
| 202569_s_at | MARK3     | MAP/microtubule affinity-regulating kinase 3                                             | 2.123 | 0.001   | 0.07 |
| 219565_at   | CYP20A1   | cytochrome P450, family 20, subfamily A, polypeptide 1                                   | 2.122 | 0.004   | 0.14 |
| 225346_at   | MTERFD3   | MTERF domain containing 3                                                                | 2.122 | 0.002   | 0.11 |
| 213645_at   | ENOSF1    | enolase superfamily member 1                                                             | 2.121 | 0.002   | 0.11 |
| 219109_at   | SPAG16    | sperm associated antigen 16                                                              | 2.121 | 0.001   | 0.08 |
| 230009_at   | FAM118B   | family with sequence similarity 118, member B                                            | 2.12  | 0.001   | 0.07 |
| 203506_s_at | MED12     | mediator complex subunit 12                                                              | 2.119 | 0.008   | 0.19 |
| 216607_s_at | CYP51A1   | cytochrome P450, family 51, subfamily A, polypeptide 1                                   | 2.119 | 0.003   | 0.12 |
| 58367_s_at  | ZNF419    | zinc finger protein 419                                                                  | 2.116 | 0.008   | 0.19 |
| 224492_s_at | ZNF627    | zinc finger protein 627                                                                  | 2.111 | 0.005   | 0.15 |
| 226152_at   | TTC7B     | tetratricopeptide repeat domain 7B                                                       | 2.11  | 0.005   | 0.16 |
| 207900_at   | CCL17     | chemokine (C-C motif) ligand 17                                                          | 2.109 | <0.0001 | 0.06 |
| 229028_s_at | ARL17     | ADP-ribosylation factor-like 17                                                          | 2.109 | 0.006   | 0.17 |
| 225114_at   | AGPS      | alkylglycerone phosphate synthase                                                        | 2.108 | 0.002   | 0.11 |
| 1569791_at  | STK4      | serine/threonine kinase 4                                                                | 2.105 | 0.006   | 0.17 |
| 226159_at   | C5orf51   | chromosome 5 open reading frame 51                                                       | 2.105 | 0.001   | 0.08 |
| 203519_s_at | UPF2      | UPF2 regulator of nonsense transcripts homolog (yeast)                                   | 2.103 | <0.0001 | 0.03 |
| 235911_at   | LOC440995 | hypothetical protein LOC440995                                                           | 2.103 | 0.003   | 0.13 |
| 244110_at   | MLL       | myeloid/lymphoid or mixed-lineage leukemia (trithorax homolog, Drosophila)               | 2.101 | 0.005   | 0.16 |
| 1556588_at  | C15orf37  | chromosome 15 open reading frame 37                                                      | 2.1   | 0.002   | 0.11 |
| 220754_at   | ARMC9     | armadillo repeat containing 9                                                            | 2.098 | 0.004   | 0.15 |
| 226413_at   | LOC400027 | hypothetical protein LOC400027                                                           | 2.098 | 0.006   | 0.17 |
| 203446_s_at | OCRL      | oculocerebrorenal syndrome of Lowe                                                       | 2.097 | <0.0001 | 0.06 |
| 208647_at   | FDFT1     | farnesyl-diphosphate farnesyltransferase 1                                               | 2.097 | 0.002   | 0.1  |
| 202469_s_at | CPSF6     | cleavage and polyadenylation specific factor 6, 68kDa                                    | 2.09  | 0.003   | 0.13 |
| 229437_at   | MIR155HG  | MIR155 host gene (non-protein coding)                                                    | 2.09  | 0.001   | 0.09 |
| 207176_s_at | CD80      | CD80 molecule                                                                            | 2.089 | 0.001   | 0.07 |
| 218852_at   | PPP2R3C   | protein phosphatase 2 (formerly 2A), regulatory subunit B", gamma                        | 2.087 | <0.0001 | 0.01 |
| 204143_s_at | ENOSF1    | enolase superfamily member 1                                                             | 2.086 | 0.006   | 0.17 |
| 229126_at   | TMEM19    | transmembrane protein 19                                                                 | 2.086 | <0.0001 | 0.06 |
| 212403_at   | UBE3B     | ubiquitin protein ligase E3B                                                             | 2.081 | 0.007   | 0.18 |
| 200638_s_at | YWHAZ     | tyrosine 3-monooxygenase/tryptophan 5-monooxygenase activation protein, zeta polypeptide | 2.074 | 0.001   | 0.08 |
| 213415_at   | CLIC2     | chloride intracellular channel 2                                                         | 2.072 | 0.004   | 0.15 |
| 209799_at   | PRKAA1    | protein kinase, AMP-activated, alpha 1 catalytic subunit                                 | 2.071 | 0.002   | 0.11 |
| 228747_at   | SEC61A2   | Sec61 alpha 2 subunit (S. cerevisiae)                                                    | 2.068 | 0.005   | 0.16 |
| 225049_at   | BLOC1S2   | biogenesis of lysosomal organelles complex-1, subunit 2                                  | 2.066 | 0.007   | 0.18 |
| 221881_s_at | CLIC4     | chloride intracellular channel 4                                                         | 2.065 | <0.0001 | 0.06 |
| 201560_at   | CLIC4     | chloride intracellular channel 4                                                         | 2.064 | 0.007   | 0.18 |
| 201824_at   | RNF14     | ring finger protein 14                                                                   | 2.062 | 0.001   | 0.08 |
| 221732_at   | CANT1     | calcium activated nucleotidase 1                                                         | 2.057 | 0.002   | 0.11 |
| 210216_x_at | RAD1      | RAD1 homolog (S. pombe)                                                                  | 2.055 | <0.0001 | 0.05 |
| 200906_s_at | PALLD     | palladin, cytoskeletal associated protein                                                | 2.052 | 0.004   | 0.15 |

|              |           |                                                                                |       |         |      |
|--------------|-----------|--------------------------------------------------------------------------------|-------|---------|------|
| 224790_at    | ASAP1     | ArfGAP with SH3 domain, ankyrin repeat and PH domain 1                         | 2.052 | 0.004   | 0.15 |
| 203633_at    | CPT1A     | carnitine palmitoyltransferase 1A (liver)                                      | 2.051 | 0.003   | 0.14 |
| 205530_at    | ETFDH     | electron-transferring-flavoprotein dehydrogenase                               | 2.05  | 0.003   | 0.13 |
| 233040_at    | PLEKHA5   | pleckstrin homology domain containing, family A member 5                       | 2.049 | 0.008   | 0.19 |
| 234351_x_at  | TRPS1     | trichorhinophalangeal syndrome I                                               | 2.048 | 0.004   | 0.15 |
| 209892_at    | FUT4      | fucosyltransferase 4 (alpha (1,3) fucosyltransferase, myeloid-specific)        | 2.047 | 0.007   | 0.18 |
| 212200_at    | ANKLE2    | ankyrin repeat and LEM domain containing 2                                     | 2.047 | 0.004   | 0.15 |
| 1552264_a_at | MAPK1     | mitogen-activated protein kinase 1                                             | 2.046 | 0.003   | 0.13 |
| 206756_at    | CHST7     | carbohydrate (N-acetylglucosamine 6-O) sulfotransferase 7                      | 2.043 | 0.001   | 0.07 |
| 226188_at    | HSPC159   | galectin-related protein                                                       | 2.043 | 0.001   | 0.09 |
| 202156_s_at  | CUGBP2    | CUG triplet repeat, RNA binding protein 2                                      | 2.042 | 0.001   | 0.08 |
| 202334_s_at  | UBE2B     | ubiquitin-conjugating enzyme E2B (RAD6 homolog)                                | 2.04  | 0.005   | 0.15 |
| 213305_s_at  | PPP2R5C   | protein phosphatase 2, regulatory subunit B', gamma isoform                    | 2.04  | <0.0001 | 0.03 |
| 228245_s_at  |           |                                                                                | 2.038 | 0.008   | 0.19 |
| 210458_s_at  | TANK      | TRAF family member-associated NFkB activator                                   | 2.034 | 0.003   | 0.14 |
| 205681_at    | BCL2A1    | BCL2-related protein A1                                                        | 2.033 | 0.003   | 0.13 |
| 224791_at    | ASAP1     | ArfGAP with SH3 domain, ankyrin repeat and PH domain 1                         | 2.032 | 0.006   | 0.17 |
| 222113_s_at  | EPS15L1   | epidermal growth factor receptor pathway substrate 15-like 1                   | 2.031 | 0.007   | 0.18 |
| 223548_at    | C1orf26   | chromosome 1 open reading frame 26                                             | 2.031 | 0.001   | 0.08 |
| 212549_at    | STAT5B    | signal transducer and activator of transcription 5B                            | 2.027 | 0.004   | 0.15 |
| 226261_at    | ZNRF2     | zinc and ring finger 2                                                         | 2.027 | 0.003   | 0.12 |
| 224445_s_at  | ZFYVE21   | zinc finger, FYVE domain containing 21                                         | 2.023 | 0.002   | 0.11 |
| 212166_at    | XPO7      | exportin 7                                                                     | 2.022 | 0.004   | 0.15 |
| 211758_x_at  | TXNDC9    | thioredoxin domain containing 9                                                | 2.02  | 0.001   | 0.07 |
| 224675_at    | MESDC2    | mesoderm development candidate 2                                               | 2.018 | 0.001   | 0.09 |
| 1552291_at   | PIGX      | phosphatidylinositol glycan anchor biosynthesis, class X                       | 2.015 | 0.001   | 0.09 |
| 201132_at    | HNRNP2    | heterogeneous nuclear ribonucleoprotein H2 (H')                                | 2.015 | 0.005   | 0.15 |
| 212780_at    | SOS1      | son of sevenless homolog 1 (Drosophila)                                        | 2.014 | 0.005   | 0.15 |
| 203097_s_at  | RAPGEF2   | Rap guanine nucleotide exchange factor (GEF) 2                                 | 2.01  | 0.006   | 0.17 |
| 206862_at    | ZNF254    | zinc finger protein 254                                                        | 2.008 | <0.0001 | 0.04 |
| 217690_at    |           |                                                                                | 2.006 | 0.003   | 0.13 |
| 219495_s_at  | ZNF180    | zinc finger protein 180                                                        | 2.006 | 0.002   | 0.11 |
| 229429_x_at  | LOC728855 | hypothetical LOC728855                                                         | 2.006 | 0.006   | 0.17 |
| 203578_s_at  | SLC7A6    | solute carrier family 7 (cationic amino acid transporter, y+ system), member 6 | 2.005 | 0.008   | 0.19 |
| 212410_at    | EFHA1     | EF-hand domain family, member A1                                               | 2.005 | 0.003   | 0.13 |
| 203375_s_at  | TPP2      | tripeptidyl peptidase II                                                       | 2.001 | 0.001   | 0.08 |

#### Downregulated genes in LCs from SCC

|             |         |                                                                     |       |         |      |
|-------------|---------|---------------------------------------------------------------------|-------|---------|------|
| 214414_x_at |         |                                                                     | 0.497 | 0.006   | 0.17 |
| 203092_at   | TIMM44  | translocase of inner mitochondrial membrane 44 homolog (yeast)      | 0.495 | 0.007   | 0.17 |
| 209535_s_at |         |                                                                     | 0.491 | 0.002   | 0.11 |
| 205103_at   | C1orf61 | chromosome 1 open reading frame 61                                  | 0.488 | 0.002   | 0.1  |
| 213766_x_at | GNA11   | guanine nucleotide binding protein (G protein), alpha 11 (Gq class) | 0.487 | <0.0001 | 0.06 |

|              |               |                                                                      |       |         |      |
|--------------|---------------|----------------------------------------------------------------------|-------|---------|------|
| 222233_s_at  | DCLRE1C       | DNA cross-link repair 1C (PSO2 homolog, <i>S. cerevisiae</i> )       | 0.487 | 0.001   | 0.08 |
| 209048_s_at  | ZMYND8        | zinc finger, MYND-type containing 8                                  | 0.486 | 0.002   | 0.1  |
| 203126_at    | IMPA2         | inositol(myo)-1(or 4)-monophosphatase 2                              | 0.481 | 0.008   | 0.19 |
| 237157_at    |               |                                                                      | 0.474 | 0.008   | 0.19 |
| 218066_at    | SLC12A7       | solute carrier family 12 (potassium/chloride transporters), member 7 | 0.472 | 0.001   | 0.08 |
| 232311_at    | B2M           | beta-2-microglobulin                                                 | 0.463 | <0.0001 | 0.06 |
| 239794_at    |               |                                                                      | 0.463 | 0.002   | 0.12 |
| 242794_at    | MAML3         | mastermind-like 3 ( <i>Drosophila</i> )                              | 0.463 | 0.005   | 0.16 |
| 241916_at    |               |                                                                      | 0.458 | 0.001   | 0.07 |
| 232551_at    | SLC26A6       | solute carrier family 26, member 6                                   | 0.457 | 0.002   | 0.12 |
| 220221_at    | VPS13D        | vacuolar protein sorting 13 homolog D ( <i>S. cerevisiae</i> )       | 0.456 | <0.0001 | 0.05 |
| 218002_s_at  | CXCL14        | chemokine (C-X-C motif) ligand 14                                    | 0.453 | 0.006   | 0.17 |
| 232826_at    |               |                                                                      | 0.453 | 0.006   | 0.17 |
| 219534_x_at  | CDKN1C        | cyclin-dependent kinase inhibitor 1C (p57, Kip2)                     | 0.45  | 0.005   | 0.16 |
| 214805_at    | EIF4A1        | eukaryotic translation initiation factor 4A, isoform 1               | 0.449 | 0.006   | 0.17 |
| 203973_s_at  | CEBPD         | CCAAT/enhancer binding protein (C/EBP), delta                        | 0.447 | 0.002   | 0.11 |
| 242014_at    |               |                                                                      | 0.447 | 0.004   | 0.15 |
| 221815_at    | ABHD2         | abhydrolase domain containing 2                                      | 0.442 | 0.003   | 0.13 |
| 239811_at    |               |                                                                      | 0.44  | 0.002   | 0.11 |
| 227093_at    | USP36         | ubiquitin specific peptidase 36                                      | 0.438 | 0.003   | 0.12 |
| 238157_at    |               |                                                                      | 0.438 | 0.004   | 0.15 |
| 225618_at    | ARHGAP27      | Rho GTPase activating protein 27                                     | 0.435 | 0.006   | 0.17 |
| 236439_at    |               |                                                                      | 0.435 | 0.006   | 0.17 |
| 231108_at    | FUS           | fusion (involved in t(12;16) in malignant liposarcoma)               | 0.433 | 0.006   | 0.17 |
| 203240_at    |               |                                                                      | 0.432 | 0.006   | 0.17 |
| 238672_at    |               |                                                                      | 0.431 | <0.0001 | 0.03 |
| 244204_at    |               |                                                                      | 0.43  | 0.004   | 0.15 |
| 230529_at    | HECA          | headcase homolog ( <i>Drosophila</i> )                               | 0.424 | 0.007   | 0.18 |
| 239049_at    |               |                                                                      | 0.423 | 0.003   | 0.13 |
| 242946_at    | CD53          | CD53 molecule                                                        | 0.418 | 0.001   | 0.08 |
| 1552482_at   | RAPH1         | Ras association (RalGDS/AF-6) and pleckstrin homology domains 1      | 0.417 | 0.007   | 0.18 |
| 204687_at    | DKFZP564O0823 | prostatic androgen-repressed message-1                               | 0.415 | 0.003   | 0.13 |
| 1568780_at   | LOC649305     | hypothetical LOC649305                                               | 0.413 | 0.002   | 0.11 |
| 237180_at    | PSME4         | proteasome (prosome, macropain) activator subunit 4                  | 0.413 | 0.006   | 0.17 |
| 235730_at    |               |                                                                      | 0.412 | 0.001   | 0.07 |
| 231252_at    | C2orf67       | chromosome 2 open reading frame 67                                   | 0.41  | 0.005   | 0.16 |
| 230207_s_at  | DOCK5         | dedicator of cytokinesis 5                                           | 0.405 | <0.0001 | 0.05 |
| 205349_at    | GNA15         | guanine nucleotide binding protein (G protein), alpha 15 (Gq class)  | 0.399 | 0.006   | 0.17 |
| 61734_at     | RCN3          | reticulocalbin 3, EF-hand calcium binding domain                     | 0.396 | 0.001   | 0.09 |
| 1556814_a_at |               |                                                                      | 0.39  | 0.005   | 0.16 |
| 238967_at    |               |                                                                      | 0.386 | 0.001   | 0.07 |
| 202005_at    | ST14          | suppression of tumorigenicity 14 (colon carcinoma)                   | 0.384 | 0.005   | 0.16 |

|             |           |                                                                                         |       |         |      |
|-------------|-----------|-----------------------------------------------------------------------------------------|-------|---------|------|
| 217988_at   | CCNB1IP1  | cyclin B1 interacting protein 1                                                         | 0.381 | 0.004   | 0.14 |
| 242325_at   | YWHAH     | tyrosine 3-monooxygenase/tryptophan 5-monooxygenase activation protein, eta polypeptide | 0.381 | 0.002   | 0.11 |
| 216905_s_at | ST14      | suppression of tumorigenicity 14 (colon carcinoma)                                      | 0.378 | 0.002   | 0.11 |
| 235589_s_at |           |                                                                                         | 0.378 | 0.008   | 0.19 |
| 212123_at   | TCTN3     | tectonic family member 3                                                                | 0.374 | 0.004   | 0.15 |
| 228487_s_at |           |                                                                                         | 0.374 | <0.0001 | 0.01 |
| 230494_at   | SLC20A1   | solute carrier family 20 (phosphate transporter), member 1                              | 0.37  | 0.006   | 0.17 |
| 217996_at   | PHLDA1    | pleckstrin homology-like domain, family A, member 1                                     | 0.364 | <0.0001 | 0.04 |
| 226907_at   | PPP1R14C  | protein phosphatase 1, regulatory (inhibitor) subunit 14C                               | 0.349 | 0.001   | 0.08 |
| 238715_at   | LOC646014 | hypothetical protein LOC646014                                                          | 0.346 | <0.0001 | 0.01 |
| 216682_s_at | FAM48A    | family with sequence similarity 48, member A                                            | 0.343 | 0.005   | 0.16 |
| 221704_s_at | VPS37B    | vacuolar protein sorting 37 homolog B (S. cerevisiae)                                   | 0.342 | 0.008   | 0.19 |
| 227998_at   | S100A16   | S100 calcium binding protein A16                                                        | 0.342 | 0.004   | 0.15 |
| 210380_s_at | CACNA1G   | calcium channel, voltage-dependent, T type, alpha 1G subunit                            | 0.339 | 0.001   | 0.07 |
| 229041_s_at |           |                                                                                         | 0.333 | 0.004   | 0.15 |
| 237690_at   | GPR115    | G protein-coupled receptor 115                                                          | 0.325 | 0.001   | 0.09 |
| 212384_at   | BAT1      | HLA-B associated transcript 1                                                           | 0.324 | 0.004   | 0.15 |
| 222549_at   | CLDN1     | claudin 1                                                                               | 0.317 | <0.0001 | 0.03 |
| 225251_at   | RAB24     | RAB24, member RAS oncogene family                                                       | 0.316 | 0.006   | 0.17 |
| 230233_at   |           |                                                                                         | 0.307 | 0.008   | 0.18 |
| 219377_at   | FAM59A    | family with sequence similarity 59, member A                                            | 0.303 | 0.001   | 0.07 |
| 212188_at   | KCTD12    | potassium channel tetramerisation domain containing 12                                  | 0.302 | <0.0001 | 0.06 |
| 226213_at   | ERBB3     | v-erb-b2 erythroblastic leukemia viral oncogene homolog 3 (avian)                       | 0.301 | 0.003   | 0.13 |
| 204446_s_at | ALOX5     | arachidonate 5-lipoxygenase                                                             | 0.296 | 0.001   | 0.09 |
| 201131_s_at | CDH1      | cadherin 1, type 1, E-cadherin (epithelial)                                             | 0.289 | 0.005   | 0.16 |
| 222670_s_at | MAFB      | v-maf musculoaponeurotic fibrosarcoma oncogene homolog B (avian)                        | 0.288 | 0.001   | 0.09 |
| 204595_s_at | STC1      | stanniocalcin 1                                                                         | 0.286 | 0.004   | 0.15 |
| 218644_at   | PLEK2     | pleckstrin 2                                                                            | 0.282 | 0.001   | 0.08 |
| 201596_x_at | KRT18     | keratin 18                                                                              | 0.28  | 0.001   | 0.07 |
| 201656_at   | ITGA6     | integrin, alpha 6                                                                       | 0.279 | 0.005   | 0.16 |
| 229396_at   | OVOL1     | ovo-like 1(Drosophila)                                                                  | 0.273 | 0.001   | 0.08 |
| 212086_x_at | LMNA      | lamin A/C                                                                               | 0.269 | 0.001   | 0.07 |
| 227404_s_at | EGR1      | early growth response 1                                                                 | 0.264 | <0.0001 | 0.06 |
| 1565579_at  |           |                                                                                         | 0.263 | 0.001   | 0.08 |
| 225173_at   | ARHGAP18  | Rho GTPase activating protein 18                                                        | 0.249 | 0.006   | 0.17 |
| 242664_at   |           |                                                                                         | 0.248 | 0.005   | 0.16 |
| 243797_at   | STK17B    | serine/threonine kinase 17b                                                             | 0.247 | 0.007   | 0.17 |
| 219799_s_at | DHRS9     | dehydrogenase/reductase (SDR family) member 9                                           | 0.246 | 0.002   | 0.12 |
| 213338_at   | TMEM158   | transmembrane protein 158                                                               | 0.24  | 0.001   | 0.08 |
| 201695_s_at | NP        | nucleoside phosphorylase                                                                | 0.226 | 0.003   | 0.13 |
| 213848_at   |           |                                                                                         | 0.223 | 0.002   | 0.12 |
| 215813_s_at | PTGS1     | prostaglandin-endoperoxide synthase 1 (prostaglandin G/H synthase and cyclooxygenase)   | 0.206 | <0.0001 | 0.06 |

|             |         |                                                                                       |       |         |      |
|-------------|---------|---------------------------------------------------------------------------------------|-------|---------|------|
| 231849_at   | KRT80   | keratin 80                                                                            | 0.206 | <0.0001 | 0.05 |
| 205220_at   | NIACR2  | niacin receptor 2                                                                     | 0.204 | 0.007   | 0.18 |
| 230206_at   | DOCK5   | dedicator of cytokinesis 5                                                            | 0.204 | <0.0001 | 0.06 |
| 204268_at   | S100A2  | S100 calcium binding protein A2                                                       | 0.195 | <0.0001 | 0.06 |
| 238017_at   | SDR16C5 | short chain dehydrogenase/reductase family 16C, member 5                              | 0.189 | 0.002   | 0.11 |
| 205128_x_at | PTGS1   | prostaglandin-endoperoxide synthase 1 (prostaglandin G/H synthase and cyclooxygenase) | 0.168 | <0.0001 | 0.05 |
| 206726_at   | HPGDS   | hematopoietic prostaglandin D synthase                                                | 0.124 | 0.003   | 0.13 |
| 204952_at   | LYPD3   | LY6/PLAUR domain containing 3                                                         | 0.121 | 0.002   | 0.11 |

**Table S2: Antibodies used for flow cytometry**

| <b>Antigen-fluorophor</b>      | <b>Manufacturer</b> | <b>Clone<sup>a</sup></b> | <b>Isotype</b> | <b>Dilution</b> |
|--------------------------------|---------------------|--------------------------|----------------|-----------------|
| HLA-DR-Alexa Fluor 700         | BioLegend           | L243                     | IgG2a          | 1:1000          |
| CD207- Phycoerythrin           | Immunotech          | DCGM4                    | IgG1           | 1:100           |
| CD207- Alexa 647               | IMGENEX             | DCGM4/122D5.03           | IgG1           | 1:50            |
| CD40-FITC                      | BD Pharmingen       | 5C3                      | IgG1           | 1:20            |
| CD80-FITC                      | BD Pharmingen       | L307.4                   | IgG1           | 1:20            |
| CD83-Allophycocyanin           | BD Pharmingen       | HB15e                    | IgG1           | 1:33            |
| CD86-Allophycocyanin           | BD Pharmingen       | 2331(FUN-1)              | IgG1           | 1:100           |
| CD3-Allophycocyanin            | BD Pharmingen       | SK7                      | IgG1           | 1:500           |
| CD3-Pacific Blue               | eBioscience         | 500A2                    | IgG2a          | 1:40            |
| CD4-Phycoerythrin-Cy7          | eBioscience         | RPA-T4                   | IgG1           | 1:200           |
| CD8-PerCp-Cy5.5                | BD Pharmingen       | RPA-T7                   | IgG1           | 1:50            |
| IFN- $\gamma$ -Alexa Fluor 700 | BD Pharmingen       | L243                     | IgG1           | 1:200           |
| IL-4-Phycoerythrin             | BD Pharmingen       | 8D4-8                    | IgG1           | 1:20            |
| IL-17-Alexa Fluor 488          | eBioscience         | eBio17B7                 | IgG1           | 1:20            |
| IL-22-Allophycocyanin          | R & D systems       | 142928                   | IgG1           | 1:20            |
| CD1a- Phycoerythrin            | BD Pharmingen       | HI149                    | IgG1           | 1:33            |
| CD14- Allophycocyanin          | BD Pharmingen       | M $\phi$ P9              | IgG2b          | 1:33            |
| CD150-FITC                     | BioLegend           | A12(7D4)                 | IgG1           | 1:20            |
| CD25-FITC                      | BD Pharmingen       | 2A3                      | IgG1           | 1:20            |
| CD137- Allophycocyanin         | BD Pharmingen       | 4B4-1                    | IgG1           | 1:20            |

|                        |               |        |      |      |
|------------------------|---------------|--------|------|------|
| CD200-FITC             | AbD Serotec   | OX2    | IgG1 | 1:20 |
| CD205- Alexa Fluor 647 | BD Pharmingen | MMRI-7 | IgG1 | 1:20 |
| RANK- Phycoerythrin    | Abcam         | 9A725  | IgG1 | 1:20 |

<sup>a</sup>All are murine monoclonals.
